# Supplementary material for: Insights into the adsorption and energy transfer of Ag clusters on the AgCl(100) surface
Source: Royal Society of Chemistry journal article supplement (doi:10.1039/c3cp44519d), 2013-01-01
Supplement: c3cp44519d.pdf [file c3cp44519d.pdf]

Supporting information

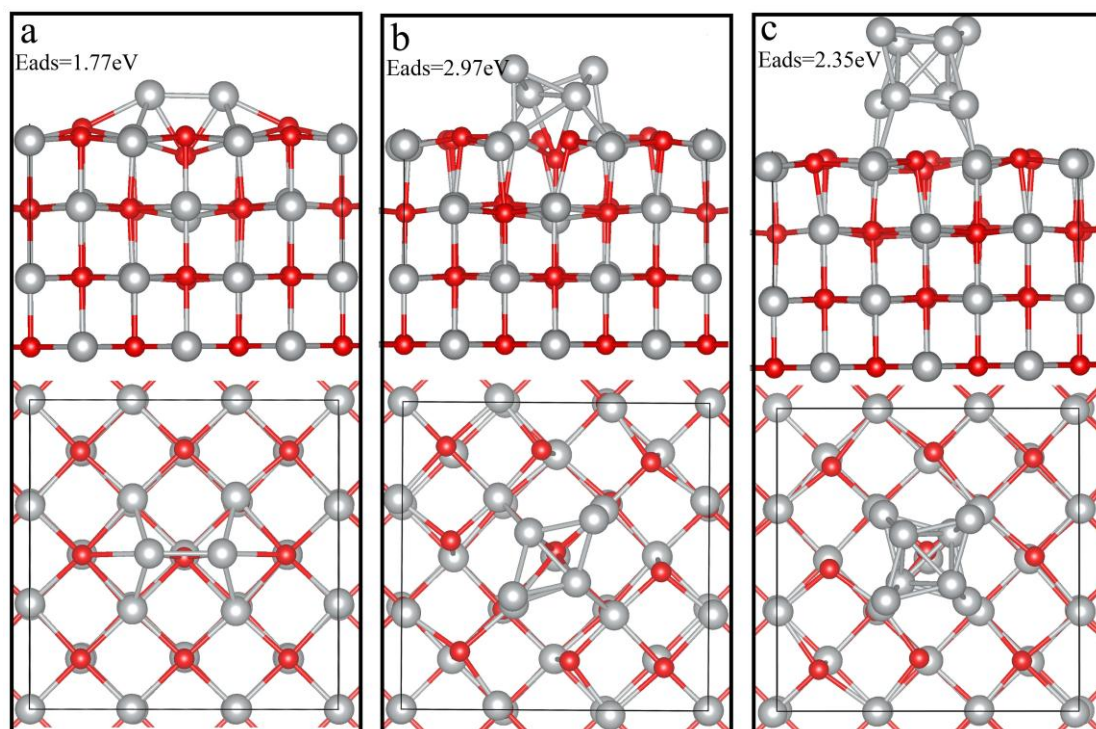

Figure S1. The second most stable adsorption configurations of (a) Ag<sub>2</sub>, (b) Ag<sub>4</sub> and (c) Ag<sub>8</sub> clusters on the AgCl (100) surface along with the respective adsorption energy (Eads).
